# Supplementary material for: Disparities in care and outcomes for primary liver cancer in England during 2008–2018: a cohort study of 8.52 million primary care population using the QResearch database
Source: PubMed Central journal article supplement (PMC10186486; doi:10.1016/j.eclinm.2023.101969), 2023-05-11
Supplement: mmc1.pdf [file mmc1.pdf]

Co-investigators and members in the DeLIVER consortium

|    | Full name           | Email Address                                                                            | Primary affiliation                                                                                                    | Secondary affiliation                                                                                                       | ORCID ID                                                                                                  | Funding acknowledgements                                                                                                                                         | Other acknowledgements                                                                                                                   |
|----|---------------------|------------------------------------------------------------------------------------------|------------------------------------------------------------------------------------------------------------------------|-----------------------------------------------------------------------------------------------------------------------------|-----------------------------------------------------------------------------------------------------------|------------------------------------------------------------------------------------------------------------------------------------------------------------------|------------------------------------------------------------------------------------------------------------------------------------------|
| 1  | Eleanor Barnes      | <a href="mailto:ellie.barnes@ndm.ox.ac.uk">ellie.barnes@ndm.ox.ac.uk</a>                 | Nuffield Department of Medicine                                                                                        | OxH NHS trust                                                                                                               | 0000-0002-0860-0831                                                                                       | This work was supported by Cancer Research UK (C30358/A29725). EB is supported by the Oxford NIHR Biomedical Research Centre and is an NIHR Senior Investigator. | The views expressed in this article are those of the author and not necessarily those of the NHS, the NIHR, or the Department of health. |
| 2  | Emma Culver         | <a href="mailto:emma.culver@ndm.ox.ac.uk">emma.culver@ndm.ox.ac.uk</a>                   | Translational Gastroenterology Unit, JRH Oxford                                                                        | NDM, University of Oxford.                                                                                                  | 0000-0001-9644-8392                                                                                       | BRC Oxford                                                                                                                                                       |                                                                                                                                          |
| 3  | Roman Fischer       | <a href="mailto:roman.fischer@ndm.ox.ac.uk">roman.fischer@ndm.ox.ac.uk</a>               | Target Discovery Institute/NDM                                                                                         | CAMS Oxford Institute (COI)                                                                                                 | <a href="https://orcid.org/0000-0002-9715-5951">0000-0002-9715-5951</a>                                   | COI                                                                                                                                                              |                                                                                                                                          |
| 4  | Julia Hippisley-Cox | <a href="mailto:julia.hippisley-cox@phc.ox.ac.uk">julia.hippisley-cox@phc.ox.ac.uk</a>   | Nuffield Department of Primary Care Health Sciences, University of Oxford                                              |                                                                                                                             | <a href="http://orcid.org/0000-0002-2479-7283">http://orcid.org/0000-0002-2479-7283</a>                   | Funding from CRUK Oxford centre, John Fell fund, ISSF wellcome for the QResearch                                                                                 |                                                                                                                                          |
| 5  | Hamish Innes        | <a href="mailto:Hamish.innes@gcu.ac.uk">Hamish.innes@gcu.ac.uk</a>                       | Glasgow Caledonian University; School of Health and Life Sciences.                                                     | University of Nottingham; Division of Epidemiology and Public Health TERTIARY AFFILIATION: Public Health Scotland; Glasgow. |                                                                                                           | Medical Research Foundation (Grant ID: C0825)                                                                                                                    |                                                                                                                                          |
| 6  | William L Irving    | <a href="mailto:will.irving@nottingham.ac.uk">will.irving@nottingham.ac.uk</a>           | NIHR Nottingham Biomedical Research Centre, Nottingham University Hospitals NHS Trust and the University of Nottingham |                                                                                                                             | 0000-0002-7268-3168                                                                                       |                                                                                                                                                                  |                                                                                                                                          |
| 7  | Peter Jepsen        | <a href="mailto:pj@clin.au.dk">pj@clin.au.dk</a>                                         | Department of Hepatology and Gastroenterology, Aarhus University Hospital, Aarhus, Denmark.                            |                                                                                                                             | <a href="https://orcid.org/0000-0002-6641-1430">0000-0002-6641-1430</a>                                   | Peter Jepsen's work is funded by a grant from the Novo Nordisk Foundation. Grant reference number: NNF19OC0054612.                                               |                                                                                                                                          |
| 8  | Matt Kelly          | <a href="mailto:matt.kelly@perspectum.com">matt.kelly@perspectum.com</a>                 | Perspectum                                                                                                             |                                                                                                                             | 0000-0002-5834-635X                                                                                       | Perspectum employee.                                                                                                                                             |                                                                                                                                          |
| 9  | Paul Klenerman      | <a href="mailto:paul.klenerman@ndm.ox.ac.uk">paul.klenerman@ndm.ox.ac.uk</a>             | Nuffield Department of Medicine                                                                                        | Translational Gastroenterology Unit                                                                                         | 0000-0003-4307-9161                                                                                       | supported by Oxford NIHR BRC                                                                                                                                     |                                                                                                                                          |
| 10 | Weiqi Liao          | <a href="mailto:weiqi.liao@phc.ox.ac.uk">weiqi.liao@phc.ox.ac.uk</a>                     | Nuffield Department of Primary Care Health Sciences, University of Oxford                                              |                                                                                                                             | <a href="https://orcid.org/0000-0002-8605-3749">https://orcid.org/0000-0002-8605-3749</a>                 |                                                                                                                                                                  |                                                                                                                                          |
| 11 | Derek Mann          | <a href="mailto:derek.mann@newcastle.ac.uk">derek.mann@newcastle.ac.uk</a>               | Newcastle University                                                                                                   | Biosciences Institute                                                                                                       | <a href="https://orcid.org/0000-0003-0950-243X?lang=en">https://orcid.org/0000-0003-0950-243X?lang=en</a> | CRUK and MRC programme grants and CRUK HUNTER consortium                                                                                                         |                                                                                                                                          |
| 12 | Dr Aileen Marshall  | <a href="mailto:aileen.marshall@nhs.net">aileen.marshall@nhs.net</a>                     | Royal Free Hospital, London                                                                                            | Institute of Liver and Digestive Health, UCL                                                                                | 0000-0003-3283-6315                                                                                       | None at present. NHS staff.                                                                                                                                      |                                                                                                                                          |
| 13 | Philippa C Matthews | <a href="mailto:philippa.matthews@crick.ac.uk">philippa.matthews@crick.ac.uk</a>         | The Francis Crick Institute, 1 Midland Rd, London                                                                      | University College London                                                                                                   | 0000-0002-4036-4269                                                                                       | Wellcome Grant Ref 110110/Z/15/C, core funding from the Francis Crick Institute and University College London NIHR BRC                                           | University College London NIHR BRC                                                                                                       |
| 14 | Michael Pavlides    | <a href="mailto:michael.pavlides@cardiov.ox.ac.uk">michael.pavlides@cardiov.ox.ac.uk</a> | Radcliffe Department of Medicine                                                                                       | Translational Gastroenterology Unit                                                                                         | <a href="https://orcid.org/0000-0001-9882-8874">https://orcid.org/0000-0001-9882-8874</a>                 | supported by Oxford NIHR BRC                                                                                                                                     |                                                                                                                                          |
| 15 | Rory J R Peters     | <a href="mailto:rory.peters@ndm.ox.ac.uk">rory.peters@ndm.ox.ac.uk</a>                   | Nuffield Department of Medicine                                                                                        | Translational Gastroenterology Unit                                                                                         | 0000-0003-4347-9739                                                                                       | CRUK Clinical Research Training Fellowship                                                                                                                       |                                                                                                                                          |
| 16 | Elisabeth Pickles   | <a href="mailto:elisabeth.pickles@eng.ox.ac.uk">elisabeth.pickles@eng.ox.ac.uk</a>       | Institute of Biomedical Engineering, University of Oxford                                                              | Perspectum                                                                                                                  | 0000-0003-4974-4943                                                                                       | Royal Commission for the Exhibition of 1851 Industrial Fellowship                                                                                                |                                                                                                                                          |
| 17 | James Robineau      | <a href="mailto:james.robineau@oncology.ox.ac.uk">james.robineau@oncology.ox.ac.uk</a>   | University of Oxford                                                                                                   |                                                                                                                             |                                                                                                           |                                                                                                                                                                  |                                                                                                                                          |

## Co-investigators and members in the DeLIVER consortium

|    | Full name                 | Email Address                                                                                                                                  | Primary affiliation                                                                                      | Secondary affiliation                                                                          | ORCID ID                                                                | Funding acknowledgements                                                                                                                                                                              | Other acknowledgements |
|----|---------------------------|------------------------------------------------------------------------------------------------------------------------------------------------|----------------------------------------------------------------------------------------------------------|------------------------------------------------------------------------------------------------|-------------------------------------------------------------------------|-------------------------------------------------------------------------------------------------------------------------------------------------------------------------------------------------------|------------------------|
| 18 | Benjamin Schuster-Böckler | <a href="mailto:benjamin.schuster-boeckler@ludwig.ox.ac.uk">benjamin.schuster-boeckler@ludwig.ox.ac.uk</a>                                     | Nuffield Department of Medicine                                                                          | Ludwig Institute for Cancer Research                                                           | 0000-0002-8892-5133                                                     | supported by Ludwig Cancer Research                                                                                                                                                                   |                        |
| 19 | Chunxiao Song             | <a href="mailto:chunxiao.song@ludwig.ox.ac.uk">chunxiao.song@ludwig.ox.ac.uk</a>                                                               | Ludwig Institute for Cancer Research, Nuffield Department of Medicine, University of Oxford, Oxford, UK. | Target Discovery Institute, Nuffield Department of Medicine, University of Oxford, Oxford, UK. | <a href="https://orcid.org/0000-0002-7781-6521">0000-0002-7781-6521</a> | Ludwig Institute for Cancer Research, Cancer Research UK (C63763/A26394 and C63763/A27122), National Institute for Health Research (NIHR) Oxford Biomedical Research Centre (BRC), Emerson Collective |                        |
| 20 | Jeremy Tomlinson          | <a href="mailto:jeremy.tomlinson@ocdem.ox.ac.uk">jeremy.tomlinson@ocdem.ox.ac.uk</a>                                                           | Radcliffe Department of Medicine                                                                         | OCDEM                                                                                          | 0000-0002-3170-8533                                                     | supported by Oxford NIHR BRC                                                                                                                                                                          |                        |
| 21 | Christopher Welberry      | <a href="mailto:chris.welberry@oncimmune.com">chris.welberry@oncimmune.com</a><br><a href="mailto:cwelberry@gmail.com">cwelberry@gmail.com</a> | Oncimmune Ltd, Nottingham, United Kingdom                                                                | N/A                                                                                            | <a href="https://orcid.org/0000-0001-7432-3361">0000-0001-7432-3361</a> | N/A                                                                                                                                                                                                   | N/A                    |

Note: The co-investigators and members in the DeLIVER consortium are **in alphabetical order by surname** in this table.
